# Supplementary material for: Dual signal amplification strategy for the fabrication of an ultrasensitive electrochemiluminescenct aptasensor
Source: Royal Society of Chemistry journal article supplement (doi:10.1039/c3an01567j), 2013-01-01
Supplement: c3an01567j.pdf [file c3an01567j.pdf]

1                    **Electronic Supplementary Information (ESI) for**  
2                    **Dual signal amplification strategy for the fabrication of an**  
3                    **ultrasensitive electrochemiluminescent aptasensor**

4                    Min Zhao, Ying Zhuo\*, Yaqin Chai, Yun Xiang, Ni Liao, Guofeng Gui, Ruo Yuan\*

5                    Key Laboratory on Luminescence and Real-Time Analysis, Ministry of Education, School of  
6                    Chemistry and Chemical Engineering, Southwest University, Chongqing 400715, PR China.

7

8

9

10

11

12

13

14

15

16

17

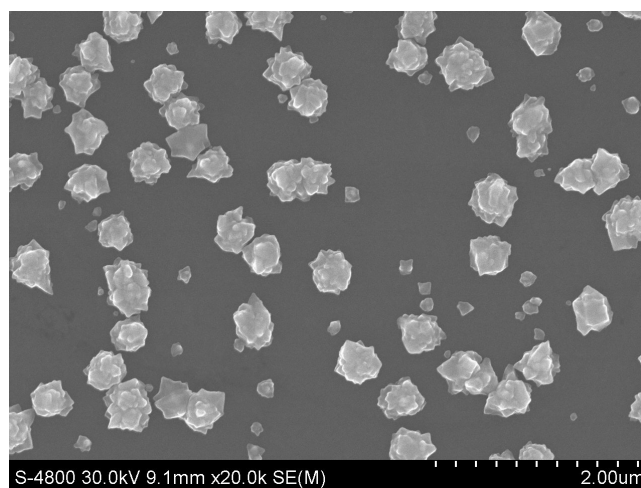

1

2

**Fig. S1** SEM images of AuNPs.

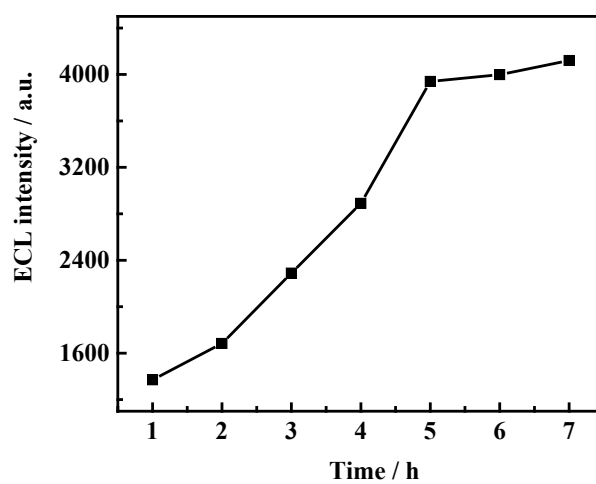

3

4

**Fig. S2** The intercalation time of PTC-L-Arg.

5

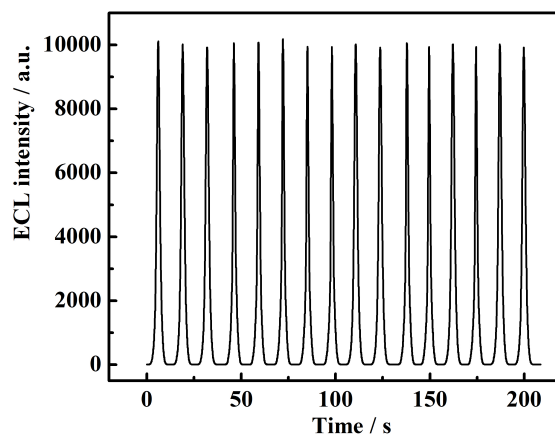

6

**Fig. S3** Stability evaluation of the as-prepared ECL aptasensor for detection 1 nM TB

1 under continuous scanning for 200s.

2
